# Supplementary material
Source: PubMed Central journal article supplement (PMC8357296)
Supplement: aem.00966-21-s0001.pdf [file aem.00966-21-s0001.pdf]

**Table 1 Characteristics of 90 antibiotic resistant isolates from pig gut**

| Strain            | Accession No. | Antibiotic Resistance profile <sup>#</sup> | Phylo-group | Place of isolation | Sample source (growth stage) |
|-------------------|---------------|--------------------------------------------|-------------|--------------------|------------------------------|
| <i>E.coli</i> 11  | MH671408      | AMP, TE                                    | B1          | Nanjing            | Post-weaned                  |
| <i>E.coli</i> 12  | MH671409      | AMP, TE, C, CN                             | C           | Nanjing            | Post-weaned                  |
| <i>E.coli</i> 13  | MH671410      | AMP, TE, C, CN, ENR, EFT                   | A           | Nanjing            | Post-weaned                  |
| <i>E.coli</i> 14  | MH671411      | AMP, TE, C, CN, ENR, EFT                   | B1          | Nanjing            | Post-weaned                  |
| <i>E.coli</i> 15  | MH671412      | AMP, TE, C                                 | C           | Nanjing            | Post-weaned                  |
| <i>E.coli</i> 22  | MH671413      | AMP, TE, C, CN                             | A           | Nanjing            | Post-weaned                  |
| <i>E.coli</i> 24  | MH671414      | AMP, TE, C, CN, ENR                        | C           | Nanjing            | Post-weaned                  |
| <i>E.coli</i> 31  | MH671415      | AMP, TE, C                                 | B1          | Nanjing            | Post-weaned                  |
| <i>E.coli</i> 33  | MH671416      | AMP, TE, ENR                               | B1          | Nanjing            | Post-weaned                  |
| <i>E.coli</i> 34  | MH671417      | AMP, TE, C                                 | B1          | Nanjing            | Post-weaned                  |
| <i>E.coli</i> 36  | MH671419      | AMP, TE, C, ENR, EFT                       | B1          | Maanshan           | Post-weaned                  |
| <i>E.coli</i> 37  | MH671420      | None                                       | B1          | Maanshan           | Post-weaned                  |
| <i>E.coli</i> 38  | MH671421      | AMP, TE, EFT                               | A           | Maanshan           | Post-weaned                  |
| <i>E.coli</i> 41  | MH671422      | AMP, TE, CN, ENR                           | C           | Maanshan           | Post-weaned                  |
| <i>E.coli</i> 42  | MH671423      | AMP, TE, C, CN                             | B1          | Maanshan           | Post-weaned                  |
| <i>E.coli</i> 44  | MH671425      | AMP, TE, C, CN                             | A           | Maanshan           | Post-weaned                  |
| <i>E.coli</i> 45  | MH671426      | AMP, TE, C, CN, ENR                        | B1          | Maanshan           | Post-weaned                  |
| <i>E.coli</i> 46  | MH671427      | AMP, TE, C                                 | C           | Maanshan           | Post-weaned                  |
| <i>E.coli</i> 47  | MH671428      | AMP, TE, CN, EFT                           | B1          | Maanshan           | Post-weaned                  |
| <i>E.coli</i> 51  | MH671429      | AMP, TE, C                                 | C           | Maanshan           | Post-weaned                  |
| <i>E.coli</i> 52  | MH671430      | AMP, TE, C, CN, ENR                        | A           | Maanshan           | Post-weaned                  |
| <i>E.coli</i> 54  | MH671431      | AMP, TE, C, CN                             | B1          | Maanshan           | Post-weaned                  |
| <i>E.coli</i> 56  | MH671432      | AMP, TE, C                                 | B1          | Maanshan           | Post-weaned                  |
| <i>E.coli</i> 57  | MH671433      | AMP, TE, C, CN, ENR                        | C           | Maanshan           | Post-weaned                  |
| <i>E.coli</i> 58  | MH671434      | AMP, TE, C, CN                             | B1          | Maanshan           | Post-weaned                  |
| <i>E.coli</i> 61  | MH671435      | AMP, TE, C, ENR                            | A           | Maanshan           | *Post-weaned                 |
| <i>E.coli</i> 62  | MH671436      | AMP, TE, CN, ENR                           | B1          | Maanshan           | *Post-weaned                 |
| <i>E.coli</i> 63  | MK156384      | AMP, TE, C, CN                             | C           | Maanshan           | *Post-weaned                 |
| <i>E.coli</i> 71  | MH671437      | AMP, TE, C, CN, ENR                        | B1          | Maanshan           | *Post-weaned                 |
| <i>E.coli</i> 72  | MH671438      | AMP, TE, C, CN, ENR, EFT                   | D           | Maanshan           | *Post-weaned                 |
| <i>E.coli</i> 73  | MH671439      | AMP, TE, C, CN, ENR                        | B1          | Maanshan           | *Post-weaned                 |
| <i>E.coli</i> 81  | MH671440      | AMP, TE, CN                                | A           | Maanshan           | Post-weaned                  |
| <i>E.coli</i> 82  | MH671441      | AMP, TE, CN, ENR                           | C           | Maanshan           | Post-weaned                  |
| <i>E.coli</i> 83  | MH671442      | AMP, TE, C, CN, ENR                        | B1          | Maanshan           | Post-weaned                  |
| <i>E.coli</i> 84  | MH671443      | AMP, TE, CN                                | C           | Maanshan           | Post-weaned                  |
| <i>E.coli</i> 85  | MH671444      | AMP, TE, CN, ENR                           | C           | Maanshan           | Post-weaned                  |
| <i>E.coli</i> 86  | MH671445      | AMP, TE, C                                 | A           | Maanshan           | Post-weaned                  |
| <i>E.coli</i> 87  | MH671446      | AMP, TE, CN, ENR                           | C           | Maanshan           | Post-weaned                  |
| <i>E.coli</i> 91  | MH671447      | AMP, TE, CN                                | B1          | Maanshan           | Post-weaned                  |
| <i>E.coli</i> 94  | MH671448      | AMP, TE, C, CN                             | C           | Maanshan           | Post-weaned                  |
| <i>E.coli</i> 95  | MH671449      | AMP, TE, CN                                | E           | Maanshan           | Post-weaned                  |
| <i>E.coli</i> 101 | MH671450      | AMP, TE, C                                 | C           | Maanshan           | Post-weaned                  |

|                      |          |                          |    |          |              |
|----------------------|----------|--------------------------|----|----------|--------------|
| <i>E.coli</i> 102    | MH671451 | TE                       | D  | Maanshan | Post-weaned  |
| <i>E.coli</i> 103    | MH671452 | AMP, TE, C, CN, ENR      | B1 | Maanshan | *Post-weaned |
| <i>E.coli</i> 104    | MH671453 | AMP, TE                  | B1 | Maanshan | Post-weaned  |
| <i>E.coli</i> 105    | MH671454 | TE, C, CN, ENR           | B1 | Maanshan | *Post-weaned |
| <i>E.coli</i> 106k88 | MK615932 | None                     | B1 | Maanshan | *Post-weaned |
| <i>E.coli</i> 121    | MH671455 | AMP, TE, CN, ENR         | B1 | Nanjing  | Pre-weaned   |
| <i>E.coli</i> 122    | MH671456 | AMP, TE, C, CN, EFT      | C  | Nanjing  | Pre-weaned   |
| <i>E.coli</i> 123    | MH671457 | AMP, TE, C               | B1 | Nanjing  | Pre-weaned   |
| <i>E.coli</i> 131    | MH671458 | AMP, TE, C, CN, EFT      | C  | Nanjing  | Pre-weaned   |
| <i>E.coli</i> 132    | MH671459 | AMP                      | B1 | Nanjing  | Pre-weaned   |
| <i>E.coli</i> 133    | MH671460 | AMP, TE, C, CN, ENR      | C  | Nanjing  | Pre-weaned   |
| <i>E.coli</i> 141    | MH671461 | AMP, C                   | E  | Nanjing  | Pre-weaned   |
| <i>E.coli</i> 142    | MH671462 | AMP, TE, C, CN, ENR      | E  | Nanjing  | Pre-weaned   |
| <i>E.coli</i> 143    | MH671463 | AMP, TE, C, CN           | E  | Nanjing  | Pre-weaned   |
| <i>E.coli</i> 145    | MH671465 | AMP, TE, C, CN, EFT      | E  | Nanjing  | Pre-weaned   |
| <i>E.coli</i> 151    | MH671466 | AMP, TE, C, ENR, EFT     | C  | Nanjing  | Pre-weaned   |
| <i>E.coli</i> 156    | MH671467 | AMP                      | C  | Nanjing  | Pre-weaned   |
| <i>E.coli</i> 161    | MH671468 | CN                       | E  | Nanjing  | Pre-weaned   |
| <i>E.coli</i> 162    | MH671469 | AMP, TE, C, CN, ENR      | B1 | Nanjing  | Pre-weaned   |
| <i>E.coli</i> 164    | MH671470 | AMP, TE, C, CN, EFT      | C  | Nanjing  | Pre-weaned   |
| <i>E.coli</i> 171    | MH671471 | AMP, TE, C, CN, ENR      | C  | Nanjing  | Pre-weaned   |
| <i>E.coli</i> 172    | MH671472 | AMP, TE, C               | C  | Nanjing  | Pre-weaned   |
| <i>E.coli</i> 173    | MH671473 | AMP, TE, C, EFT          | C  | Nanjing  | Pre-weaned   |
| <i>E.coli</i> 174    | MH671474 | AMP, TE, CN              | B1 | Nanjing  | Pre-weaned   |
| <i>E.coli</i> 181    | MH671475 | AMP, TE, C, CN, ENR      | B1 | Nanjing  | Pre-weaned   |
| <i>E.coli</i> 182    | MH671476 | AMP, TE, C               | A  | Nanjing  | Pre-weaned   |
| <i>E.coli</i> 191    | MH671477 | AMP, TE, C, CN           | B1 | Nanjing  | Pre-weaned   |
| <i>E.coli</i> 192    | MH671478 | AMP, TE, C, CN, EFT      | C  | Nanjing  | Pre-weaned   |
| <i>E.coli</i> 193    | MH671479 | AMP, TE, C               | A  | Nanjing  | Pre-weaned   |
| <i>E.coli</i> 202    | MH671481 | AMP, TE, C, ENR          | E  | Nanjing  | Pre-weaned   |
| <i>E.coli</i> 203    | MH671482 | AMP, TE, C, ENR, EFT     | B1 | Nanjing  | Pre-weaned   |
| <i>E.coli</i> 211    | MH671483 | AMP, TE                  | B1 | Nantong  | ^growing     |
| <i>E.coli</i> 212    | MH671484 | AMP, TE, CN, ENR         | A  | Nantong  | ^growing     |
| <i>E.coli</i> 231    | MH671486 | TE, C, CN, ENR, EFT      | A  | Nantong  | ^growing     |
| <i>E.coli</i> 232    | MH671487 | AMP, TE, C, CN, ENR      | A  | Nantong  | ^growing     |
| <i>E.coli</i> 233    | MH671488 | AMP, TE, C, CN, ENR, EFT | F  | Nantong  | ^growing     |
| <i>E.coli</i> 234    | MH671489 | AMP, TE, C               | B1 | Nantong  | ^growing     |
| <i>E.coli</i> 235    | MH671490 | AMP, TE, C               | A  | Nantong  | ^growing     |
| <i>E.coli</i> 236    | MH671491 | AMP, TE, C, ENR, EFT     | B1 | Nantong  | ^growing     |
| <i>E.coli</i> 237    | MH671492 | AMP, TE, C, ENR, EFT     | A  | Nantong  | ^growing     |
| <i>E.coli</i> 241    | MH671493 | AMP, TE, C, CN, ENR      | A  | Nantong  | ^growing     |
| <i>E.coli</i> 242    | MH671494 | AMP, TE, C, ENR, EFT     | A  | Nantong  | ^growing     |
| <i>E.coli</i> 243    | MH671495 | AMP, TE, C               | C  | Nantong  | ^growing     |
| <i>E.coli</i> 244    | MH671496 | AMP, TE                  | C  | Nantong  | ^growing     |

|                             |          |                      |    |          |             |
|-----------------------------|----------|----------------------|----|----------|-------------|
| <i>E.coli</i> 245           | MH671497 | AMP, TE, C, CN, ENR  | B1 | Nantong  | ^growing    |
| <i>P. mirabilis</i><br>59qi | MH643694 | AMP, TE, C, CN, ENR  | /  | Maanshan | Post-weaned |
| <i>C. freundii</i><br>113ju | MH643693 | AMP, TE              | /  | Maanshan | Post-weaned |
| <i>K.pneumonia</i><br>184   | MH643695 | AMP, TE, C, ENR, EFT | /  | Nanjing  | Pre-weaned  |

# Antibiotic resistance to 6 antimicrobial agents was detected. AMP: Ampicillin; C: Chloramphenicol; CN: Gentamicin; ENR: Enrofloxacin; EFT: Ceftiofur; TE: Tetracycline.

\* The *E. coli* strains were isolated from post-weaned piglets with diarrhea.

^ The *E. coli* strains were isolated from growing pigs of 80-100 days old.
